# Supplementary material for: Enhanced PM2.5 pollution in China due to aerosol-cloud interactions
Source: Springer Nature journal article supplement (doi:10.1038/s41598-017-04096-8), 2017-06-26
Supplement: 41598_2017_4096_MOESM1_ESM.pdf [file 41598_2017_4096_MOESM1_ESM.pdf]

1 Supplementary Materials for the paper entitled:

2 Enhanced PM<sub>2.5</sub> pollution in China due to aerosol-cloud  
3 interactions

4 Bin Zhao<sup>1, \*</sup>, Kuo-Nan Liou<sup>1</sup>, Yu Gu<sup>1</sup>, Qinbin Li<sup>1</sup>, Jonathan Jiang<sup>2</sup>, Hui Su<sup>2</sup>, Cenlin He<sup>1</sup>, Hsien-  
5 Liang R. Tseng<sup>1</sup>, Shuxiao Wang<sup>3,4</sup>, Run Liu<sup>1</sup>, Ling Qi<sup>1</sup>, Wei-Liang Lee<sup>5</sup>, and Jiming Hao<sup>3,4</sup>

6 <sup>1</sup>Joint Institute for Regional Earth System Science and Engineering and Department of  
7 Atmospheric and Oceanic Sciences, University of California, Los Angeles, CA 90095, USA

8 <sup>2</sup>Jet propulsion Laboratory, California Institute of Technology, Pasadena, California 91109, USA

9 <sup>3</sup>State Key Joint Laboratory of Environment Simulation and Pollution Control, School of  
10 Environment, Tsinghua University, Beijing 100084, China

11 <sup>4</sup>State Environmental Protection Key Laboratory of Sources and Control of Air Pollution  
12 Complex, Beijing 100084, China

13 <sup>5</sup>Research Center for Environmental Changes, Academia Sinica, Taipei, Taiwan

14

15 Corresponding to: Bin Zhao (zhaob1206@ucla.edu)

## 16 **1. Model evaluation**

17 The model predictions agree fairly well with surface meteorological observations. The MBs in  
18 January/July are 0.79/0.42 m s<sup>-1</sup>, -1.28/-1.17 K, -0.87/-1.06 g kg<sup>-1</sup>, 2.3/11.6 mm month<sup>-1</sup> for  
19 WS10, T2, Q2, and precipitation, respectively. Emery et al.<sup>1</sup> proposed benchmark values for  
20 satisfactory performance for WS10, T2, and Q2: MB within  $\pm 0.5$  m s<sup>-1</sup>, GE  $\leq 2.0$  m s<sup>-1</sup>, RMSE  
21  $\leq 2.0$  m s<sup>-1</sup> and IOA  $\geq 0.6$  for WS10, MB within  $\pm 0.5$  °C, GE  $\leq 2.0$  °C, and IOA  $\geq 0.8$  for T2,  
22 and MB within  $\pm 1.0$  g kg<sup>-1</sup>, GE of  $\leq 2.0$  g kg<sup>-1</sup>, and IOA  $\geq 0.6$  for Q2. We note that these  
23 benchmark values are proposed based on the performance of a series of model simulations with  
24 four dimensional data assimilation (FDDA). Nevertheless, FDDA is not utilized here to allow  
25 full aerosol-cloud-radiation interactions. Therefore, the model performance is not expected to be  
26 as good as those with FDDA. Table 2 in the main text shows that the performance statistics for  
27 WS10 in July and Q2 in January fall within benchmark ranges, and those for Q2 in July are very  
28 close to the benchmark ranges. The WS10 in January and T2 in both months exceed the  
29 benchmark range but still have smaller or similar biases compared with most previous WRF-  
30 Chem applications without FDDA over East Asia<sup>2-7</sup>, in which MBs range from 0.4 to 3.1 m s<sup>-1</sup>  
31 (mostly 1.2 to 2.6 m s<sup>-1</sup>) for WS10 and from -1.8 to 1.0 K (mostly -1.8 to -0.8 K) for T2,  
32 respectively. Therefore, the model performance is considered to be decent.

33 With regard to surface air quality, the model performance for PM<sub>2.5</sub> has been described in the  
34 main text. For gaseous pollutants, the model-measurement agreement is decent for NO<sub>2</sub> and daily  
35 maximum O<sub>3</sub> concentrations in both months, and SO<sub>2</sub> concentrations in January, with NMBs  
36 within  $\pm 20\%$ . The model overestimates SO<sub>2</sub> concentrations in July, likely attributable to the  
37 uncertainty in emission inventory and insufficient treatment of SO<sub>2</sub> oxidation reactions on dust  
38 surface<sup>8</sup> and on fine aerosols with high relative humidity and NH<sub>3</sub> neutralization<sup>9,10</sup>. The

39 observational data of PM<sub>2.5</sub> chemical components are quite sparse and not publicly available  
40 during the simulation periods. In this study, we compare with chemical component observations  
41 obtained during a field campaign period (from July 22<sup>nd</sup>-31<sup>st</sup>, 2013) at two sites located in the  
42 North China Plain (see Supplementary Figure 1). The comparison results are shown in  
43 Supplementary Figure 3. Simulated PM<sub>2.5</sub> concentrations agree fairly well with observations;  
44 NMBs are within ±6% for both sites. As for chemical components, NO<sub>3</sub><sup>-</sup> concentration is  
45 overestimated (NMB = 6% to 52%), while SO<sub>4</sub><sup>2-</sup> concentration is underestimated (NMB = -37%  
46 to -63%). There is a good agreement for NH<sub>4</sub><sup>+</sup> (NMB within ±23%) and total SNA (sulphate-  
47 nitrate-ammonium, NMB within ±23%). The overestimation of NO<sub>3</sub><sup>-</sup> and underestimation for  
48 SO<sub>4</sub><sup>2-</sup> are consistent with previous studies over East Asia, probably attributed to the lack of some  
49 chemical formation pathways in the modeling system <sup>8,10,11</sup>. Simulated elemental carbon (EC)  
50 concentrations approximately double observed EC concentrations. EC concentrations are  
51 strongly affected by local emissions, while the spatial distribution of our emission inventory  
52 (36 km × 36 km) may not be able to capture local emission sources surrounding observational  
53 sites, leading to model-observation bias. The overestimation may also be attributable to the  
54 absence of EC aging in WRF-Chem, which leads to reduced fraction of hydrophilic EC and thus  
55 reduced wet deposition. Finally, concentrations of organic carbon (OC) can be either  
56 underestimated or overestimated in these two sites. The current model does not include  
57 secondary organic aerosol (SOA) formation; inclusion will probably leads to higher simulated  
58 OC concentrations.

59 For the evaluation of cloud properties, the simulated cloud fraction (CF) agrees fairly well with  
60 observations over the ocean and in southern China, but significant underestimates occur in  
61 northern China, especially in January. The domain average NMBs are -32% and -9% in January

62 and July, respectively. The liquid water path (LWP) is substantially underestimated across the  
63 domain, with NMBs of  $-59\%$  and  $-74\%$  in January and July, respectively, which is a common  
64 problem for many previous chemical transport model simulations<sup>2,5,12,13</sup>. It is noted, however, the  
65 LWP retrieved from MODIS may be biased by a factor of 2 due to uncertainties in cloud particle  
66 size assumption<sup>14</sup>. The domain average cloud droplet number concentration (CDNC) is  
67 moderately underpredicted by  $29\%$  and  $38\%$  in January and July, respectively, with the most  
68 remarkable underestimates occurring on land in January. The discrepancies in cloud parameters  
69 may be related to several factors including aerosol number concentrations, water vapor, aerosol  
70 activation parameterization, cloud microphysics, and cumulus cloud schemes. For example,  
71 Zhang et al.<sup>15</sup> showed that the Abdul-Razzak and Ghan<sup>16</sup> aerosol activation parameterization  
72 used in this work tends to underpredict aerosol activation fraction and consequently underpredict  
73 CDNC and LWP compared with the Fountoukis and Nenes<sup>17</sup> parameterization. In addition, the  
74 significant underestimates of CF and LWP in northern China may be explained in part by the  
75 underestimates in water vapor mixing ratio. Finally, we note that large uncertainty in satellite-  
76 retrieved LWPs<sup>14,18</sup> and in CDNC estimation<sup>19</sup> may also partly account for the model-  
77 measurement discrepancy. Downward shortwave radiation at surface (SWD) and downward  
78 longwave radiation at surface (LWD) simulated by WRF-Chem agree fairly well with the  
79 CERES data in terms of both magnitude and spatial distributions, with NMBs of about  $11\%$  to  
80  $18\%$  and  $-8\%$  to  $-3\%$ , respectively. The slight overestimates in SWD and underestimates in  
81 LWD are likely induced by the underestimates in LWP and AOD.

82

83

84

## 85 References

- 86 1 Emery, C., Tai, E. & Yarwood, G. *Enhanced meteorological modeling and performance*  
87 *evaluation for two texas episodes. Report to the Texas Natural Resources Conservation*  
88 *Commission,*  
89 [http://www.tceq.state.tx.us/assets/public/implementation/air/am/contracts/reports/mm/E](http://www.tceq.state.tx.us/assets/public/implementation/air/am/contracts/reports/mm/EnhancedMetModelingAndPerformanceEvaluation.pdf)  
90 [nhancedMetModelingAndPerformanceEvaluation.pdf](http://www.tceq.state.tx.us/assets/public/implementation/air/am/contracts/reports/mm/EnhancedMetModelingAndPerformanceEvaluation.pdf)> (2001).
- 91 2 Cai, C. *et al.* Incorporation of new particle formation and early growth treatments into  
92 WRF/Chem: Model improvement, evaluation, and impacts of anthropogenic aerosols  
93 over East Asia. *Atmos. Environ.* **124**, 262-284, 10.1016/j.atmosenv.2015.05.046 (2016).
- 94 3 Jiang, F. *et al.* Regional modeling of secondary organic aerosol over China using  
95 WRF/Chem. *J. Aerosol. Sci.* **43**, 57-73, 10.1016/j.jaerosci.2011.09.003 (2012).
- 96 4 Zhang, B., Wang, Y. & Hao, J. Simulating aerosol-radiation-cloud feedbacks on  
97 meteorology and air quality over eastern China under severe haze conditions in winter.  
98 *Atmos. Chem. Phys.* **15**, 2387-2404, 10.5194/acp-15-2387-2015 (2015).
- 99 5 Chen, Y. *et al.* Application of an Online-Coupled Regional Climate Model, WRF-CAM5,  
100 over East Asia for Examination of Ice Nucleation Schemes: Part I. Comprehensive Model  
101 Evaluation and Trend Analysis for 2006 and 2011. *Climate* **3**, 627-667,  
102 10.3390/cli3030627 (2015).
- 103 6 Zhang, Y. *et al.* Application of WRF/Chem over East Asia: Part I. Model evaluation and  
104 intercomparison with MM5/CMAQ. *Atmos. Environ.* **124**, 285-300,  
105 10.1016/j.atmosenv.2015.07.022 (2016).
- 106 7 Zhang, Y. *et al.* Application of WRF/Chem over East Asia: Part II. Model improvement  
107 and sensitivity simulations. *Atmos. Environ.* **124**, 301-320,  
108 10.1016/j.atmosenv.2015.07.023 (2016).
- 109 8 Fu, X. *et al.* Modeling analysis of secondary inorganic aerosols over China: pollution  
110 characteristics, and meteorological and dust impacts. *Sci. Rep-Uk.* **6**, 10.1038/srep35992  
111 (2016).
- 112 9 Wang, G. H. *et al.* Persistent sulfate formation from London Fog to Chinese haze. *P. Natl.*  
113 *Acad. Sci. USA.* **113**, 13630-13635, 10.1073/pnas.1616540113 (2016).
- 114 10 Cheng, Y. F. *et al.* Reactive nitrogen chemistry in aerosol water as a source of sulfate  
115 during haze events in China. *Sci. Adv.* **2**, e1601530, DOI: 10.1126/sciadv.1601530 (2016).
- 116 11 Wang, Y., Zhang, Q. Q., He, K., Zhang, Q. & Chai, L. Sulfate-nitrate-ammonium  
117 aerosols over China: response to 2000-2015 emission changes of sulfur dioxide, nitrogen  
118 oxides, and ammonia. *Atmos. Chem. Phys.* **13**, 2635-2652, DOI 10.5194/acp-13-2635-  
119 2013 (2013).
- 120 12 Liu, X. Y., Zhang, Y., Zhang, Q. & He, M. B. Application of online-coupled  
121 WRF/Chem-MADRID in East Asia: Model evaluation and climatic effects of  
122 anthropogenic aerosols. *Atmos. Environ.* **124**, 321-336, 10.1016/j.atmosenv.2015.03.052  
123 (2016).
- 124 13 Wang, K., Zhang, Y., Yahya, K., Wu, S.-Y. & Grell, G. Implementation and initial  
125 application of new chemistry-aerosol options in WRF/Chem for simulating secondary  
126 organic aerosols and aerosol indirect effects for regional air quality. *Atmos. Environ.* **115**,  
127 716-732, 10.1016/j.atmosenv.2014.12.007 (2015).

128 14 Jiang, J. H. *et al.* Evaluation of cloud and water vapor simulations in CMIP5 climate  
129 models using NASA "A-Train" satellite observations. *J. Geophys. Res-Atmos.* **117**,  
130 10.1029/2011jd017237 (2012).

131 15 Zhang, Y. *et al.* Development and initial application of the global-through-urban weather  
132 research and forecasting model with chemistry (GU-WRF/Chem). *J. Geophys. Res-Atmos.*  
133 **117**, 10.1029/2012jd017966 (2012).

134 16 Abdul-Razzak, H. & Ghan, S. J. A parameterization of aerosol activation. 3. Sectional  
135 representation. *J. Geophys. Res.* **107**, AAC1-1-6 (2002).

136 17 Fountoukis, C. & Nenes, A. Continued development of a cloud droplet formation  
137 parameterization for global climate models. *J. Geophys. Res-Atmos.* **110**,  
138 10.1029/2004jd005591 (2005).

139 18 Seethala, C. & Horvath, A. Global assessment of AMSR-E and MODIS cloud liquid  
140 water path retrievals in warm oceanic clouds. *J. Geophys. Res-Atmos.* **115**,  
141 10.1029/2009jd012662 (2010).

142 19 Bennartz, R. Global assessment of marine boundary layer cloud droplet number  
143 concentration from satellite. *J. Geophys. Res-Atmos.* **112**, D02201,  
144 10.1029/2006jd007547 (2007).  
145  
146

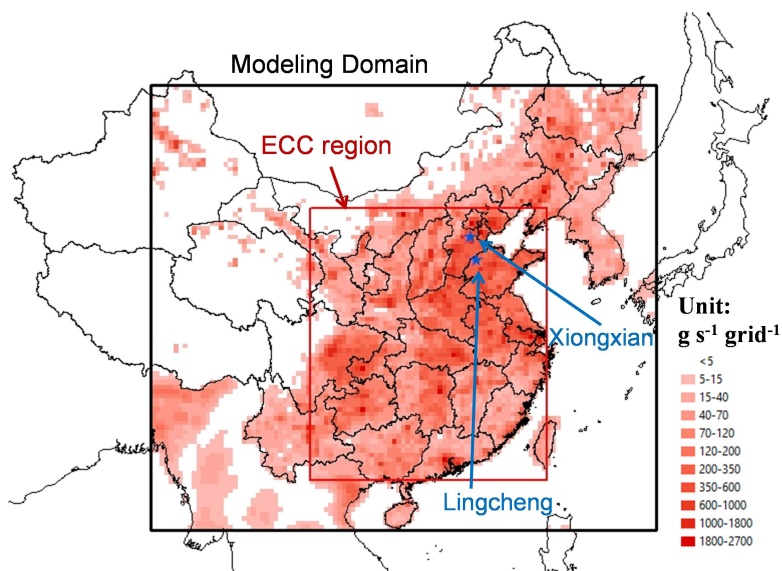

148  
149 **Supplementary Figure 1.** The WRF-Chem modeling domain at a horizontal spatial resolution  
150 of 36 km (111 × 98 cells). The two blue stars indicate locations of the Xiongxian Site and the  
151 Lingcheng Site, where observations of PM<sub>2.5</sub> chemical components are available. The red  
152 rectangle indicates the Eastern and Central China (ECC). This region has high population density  
153 and high aerosol emissions and concentrations, and is thus the focus of this study. The colors  
154 represent primary PM<sub>2.5</sub> emission rates at 8:00 a.m. January 1<sup>st</sup>, 2013. This figure is produced  
155 using DotSpatial, [version 1.7], (<http://dotspatial.codeplex.com/>) and Microsoft PowerPoint 2013  
156 (<https://www.microsoft.com/>).

Observation in January

Simulation in January

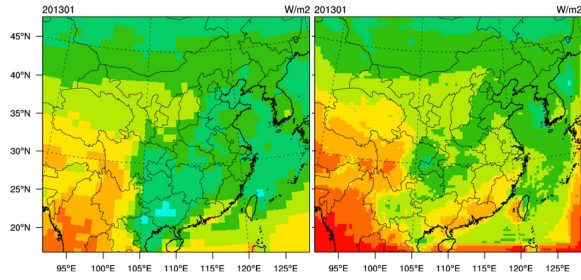

Observation in July

Simulation in July

SWD

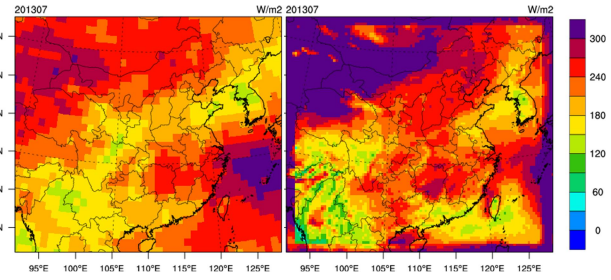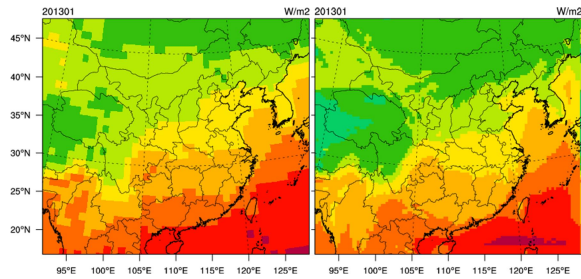

LWD

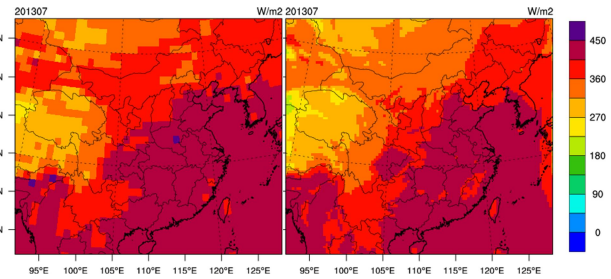

NO<sub>2</sub> vertical column density

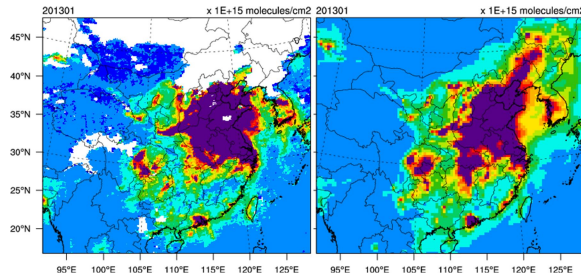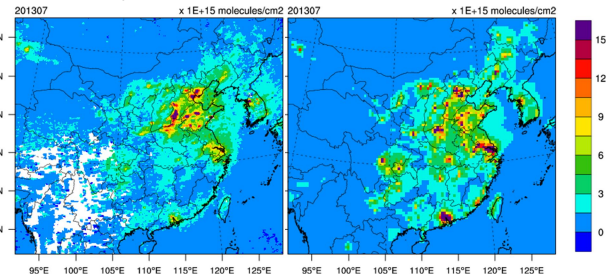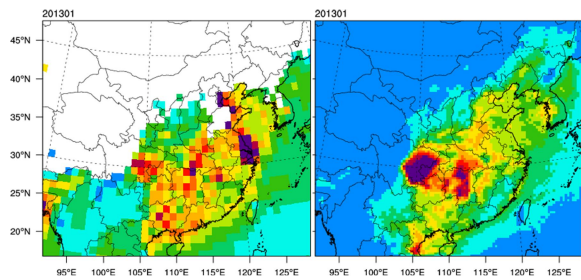

AOD

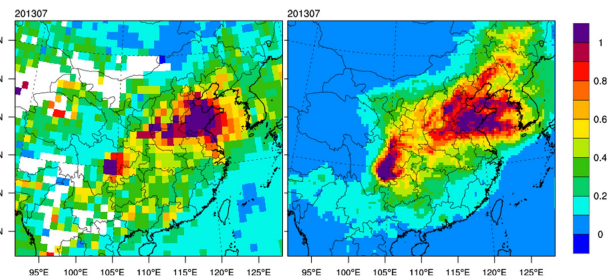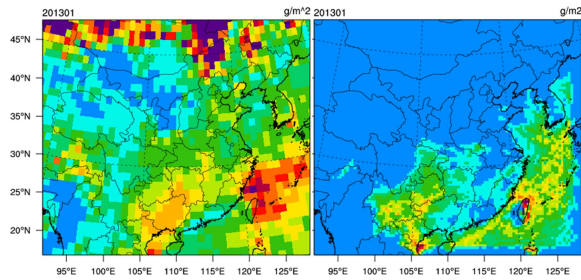

LWP

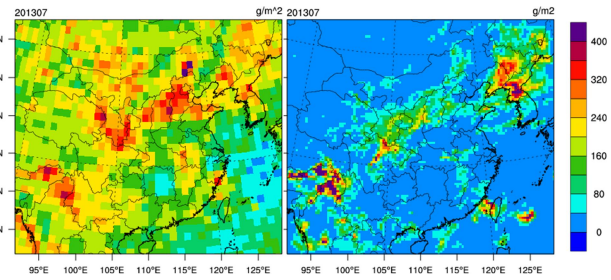

CDNC



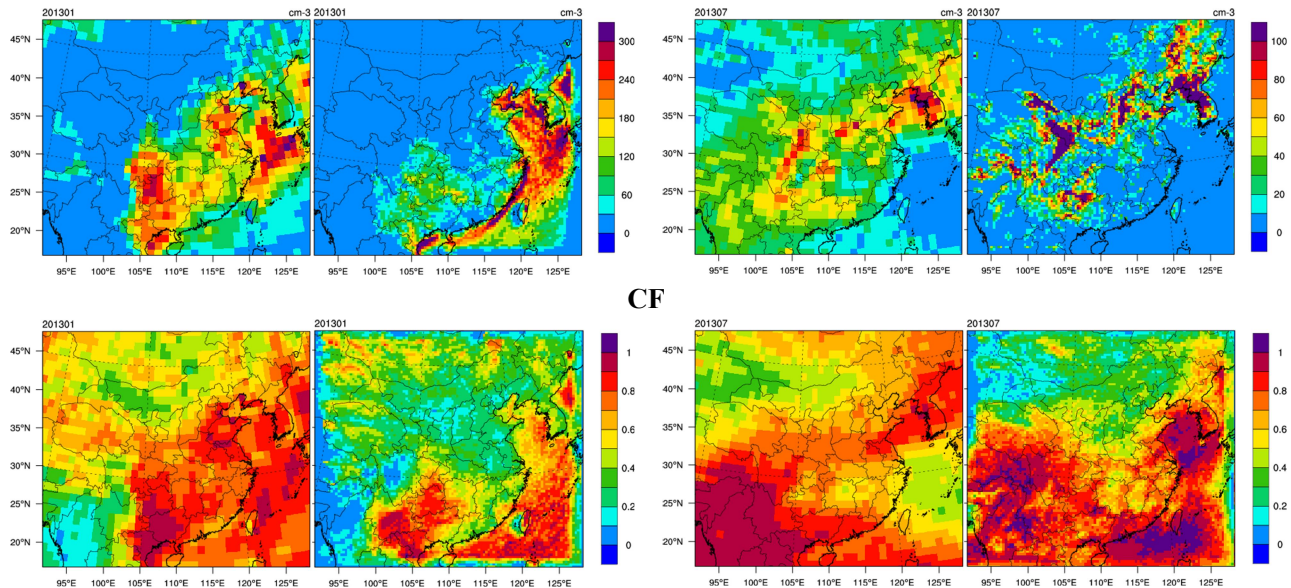

CF

157 **Supplementary Figure 2.** Comparison of simulated SWD, LWD, NO<sub>2</sub> column, AOD, and cloud  
 158 properties with satellite observations. This figure is produced using the NCAR Command  
 159 Language (Version 6.2.1) [Software]. (2014). Boulder, Colorado: UCAR/NCAR/CISL/TDD.  
 160 <http://dx.doi.org/10.5065/D6WD3XH5>.

161

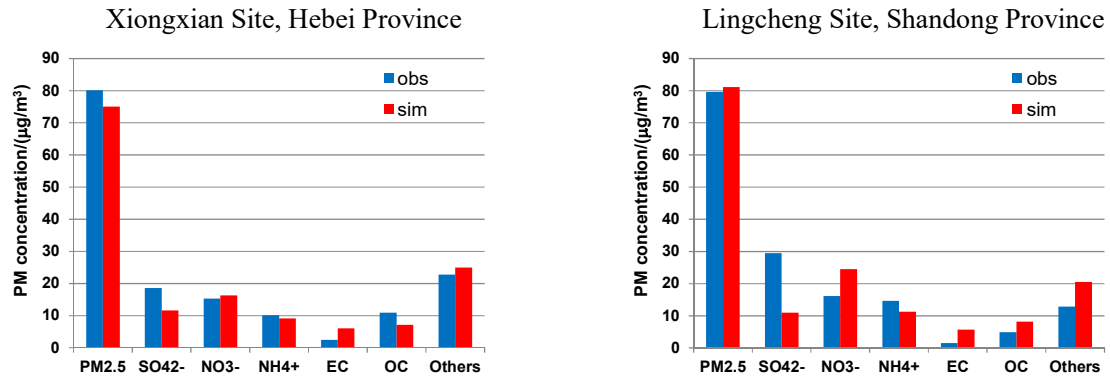

162 **Supplementary Figure 3.** Comparison of simulated concentrations of PM<sub>2.5</sub> and its chemical  
 163 components with observations at the Xiongqian Site and the Lingcheng Site. This figure shows  
 164 the average concentrations during July 22<sup>nd</sup> - July 31<sup>st</sup>.

165 **Supplementary Table 1.** Observational datasets used in model evaluation.

| Type                | Database                              | Variables                                                                                                                                         | Sites/resolution                        | Frequency              |
|---------------------|---------------------------------------|---------------------------------------------------------------------------------------------------------------------------------------------------|-----------------------------------------|------------------------|
| Surface meteorology | NCDC                                  | wind speed at 10 m (WS10), temperature at 2 m (T2), and water vapor mixing ratio at 2 m (Q2)                                                      | 380 sites                               | Hourly or every 3 hour |
|                     | GPCC                                  | precipitation                                                                                                                                     | 0.5°×0.5°                               | Monthly                |
| Surface air quality | MEP                                   | PM <sub>10</sub> , PM <sub>2.5</sub> , SO <sub>2</sub> , NO <sub>2</sub> , and O <sub>3</sub>                                                     | 496 sites in 74 large cities in China   | Hourly                 |
|                     | PM <sub>2.5</sub> chemical components | PM <sub>2.5</sub> , SO <sub>4</sub> <sup>2-</sup> , NO <sub>3</sub> <sup>-</sup> , NH <sub>4</sub> <sup>+</sup> , BC, and OC                      | 2 sites: Xiongxian Site, Lingcheng Site | Daily                  |
| Satellite           | CERES                                 | Downward shortwave radiation at surface (SWD), downward longwave radiation at surface (LWD)                                                       | 1°×1°                                   | Monthly                |
|                     | OMI                                   | NO <sub>2</sub> vertical column density                                                                                                           | 0.125°×0.125°                           | Monthly                |
|                     | MODIS/TERRA                           | aerosol optical depth (AOD), liquid water path (LWP), cloud fraction (CF), and cloud droplet number concentration (CDNC, derived from MODIS data) | 1°×1°                                   | Monthly                |

166
